# Supplementary material
Source: PubMed Central journal article supplement (PMC9713707)
Supplement: EMBJ-41-e110928-s003.pdf [file EMBJ-41-e110928-s003.pdf]

## Appendix Table of Content

|                         |         |
|-------------------------|---------|
| Appendix Figure S1..... | Page 2  |
| Appendix Figure S2..... | Page 4  |
| Appendix Figure S3..... | Page 6  |
| Appendix Figure S4..... | Page 8  |
| Appendix Figure S5..... | Page 10 |
| Appendix Figure S6..... | Page 12 |
| Appendix Figure S7..... | Page 14 |
| Appendix Figure S8..... | Page 16 |
| Appendix Figure S9..... | Page 18 |
| Appendix Table S1.....  | Page 20 |

# Appendix Figure S1

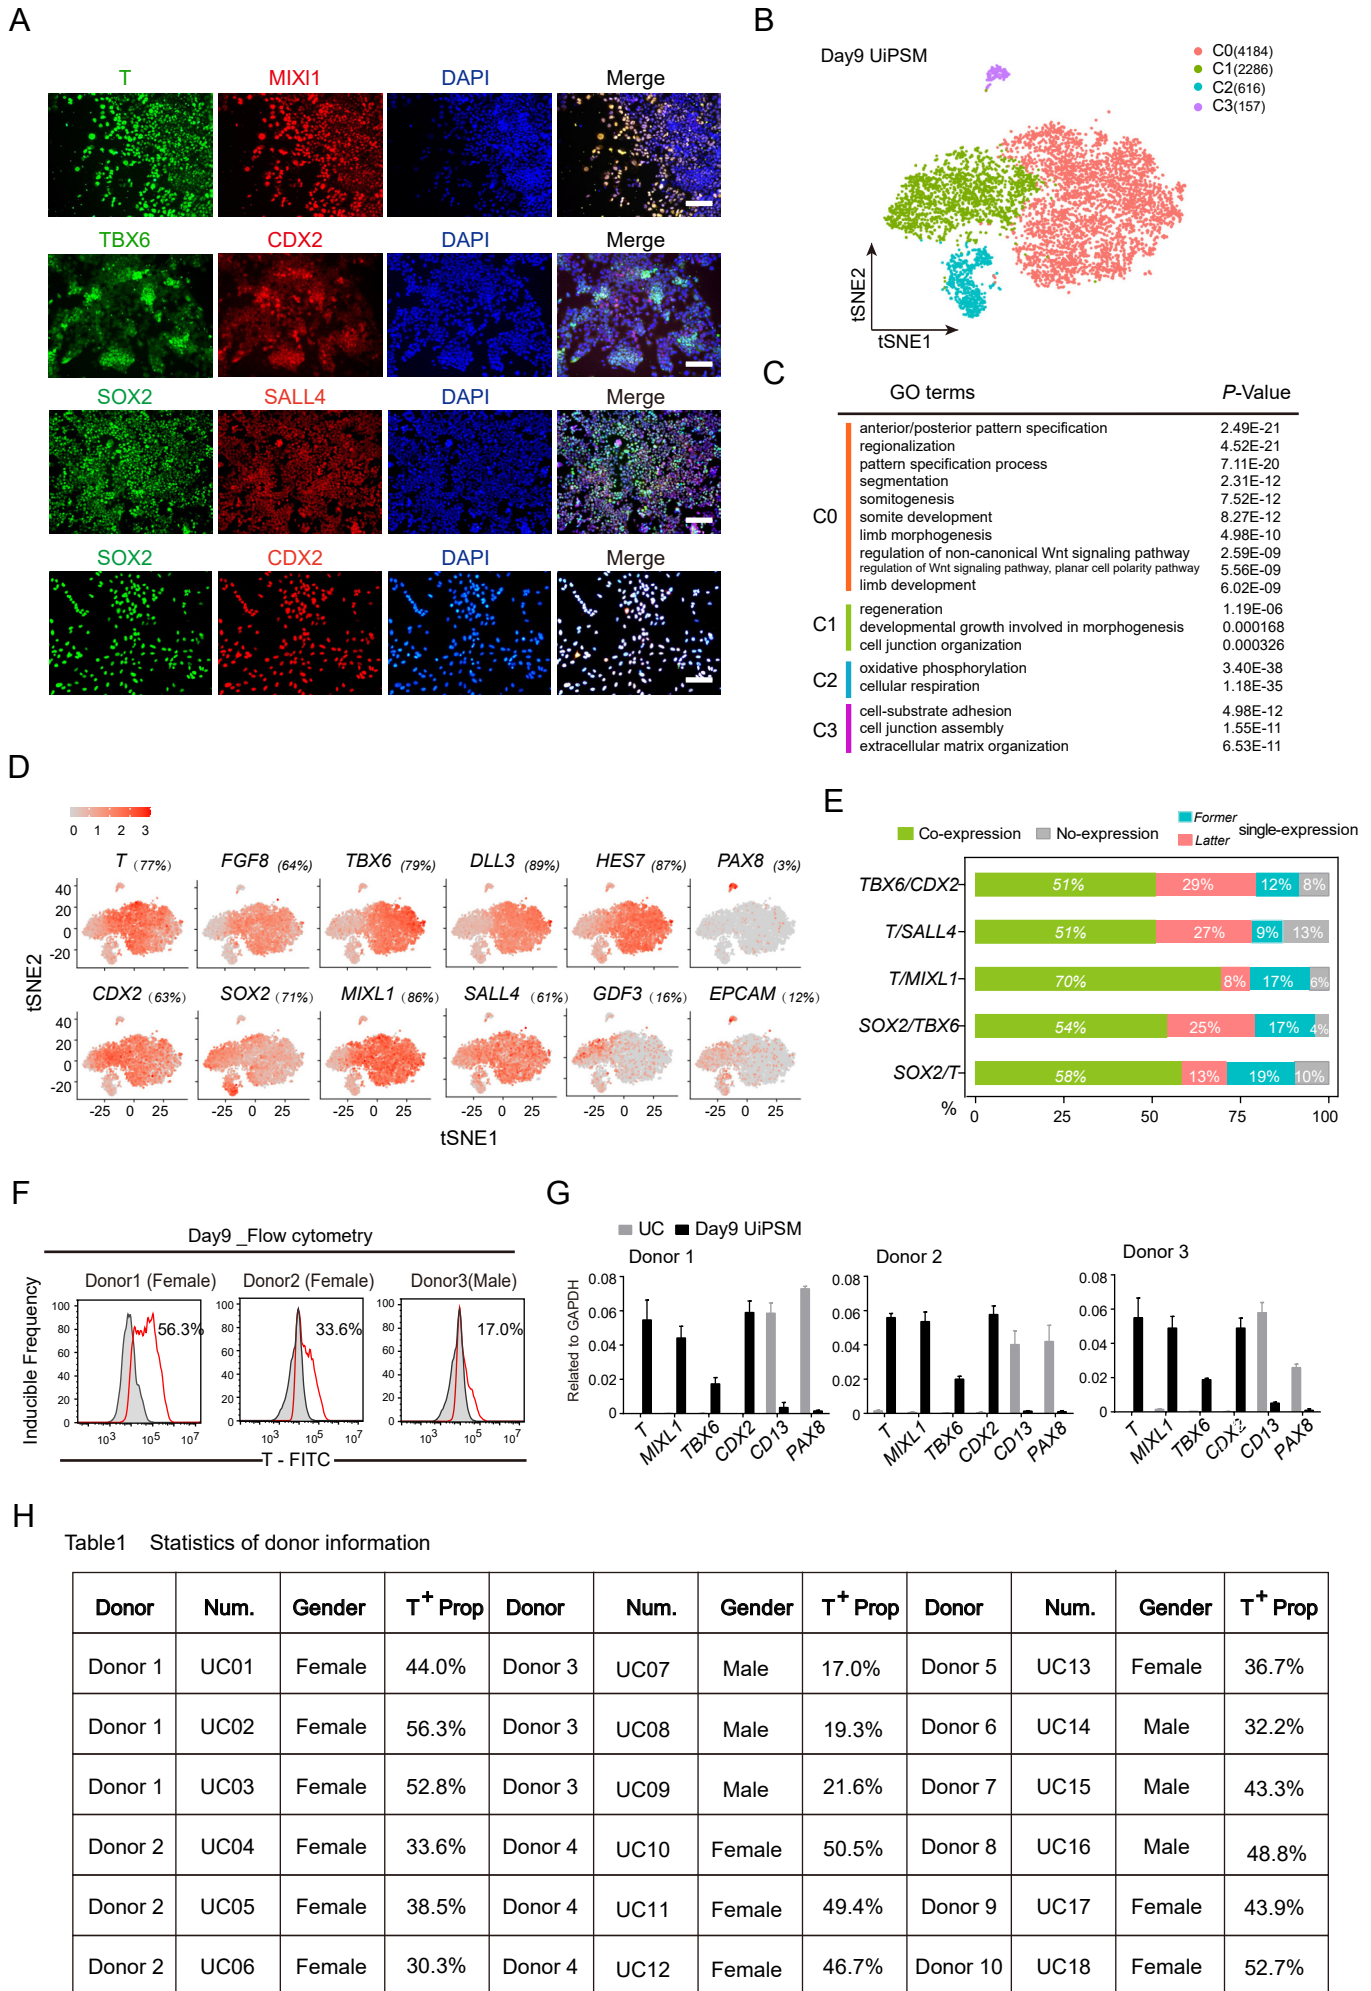

**Appendix Figure S1. Specification of the Chemical reprogramming from UC to UiPSM.**

- A. Immunofluorescence pictures of the UiPSM at day 9 (n=3 independent experiments). The scale bar represents 200  $\mu$ m.
- B. t-SNE plot of 6824 UiPSM cells at day 9 colored by clusters.
- C. GO enrichment analysis showed the potential functions of 4 groups in (B). P value was less than 0.05.
- D. t-SNE projection of cells colored by typical presomitic-related gene expressions at day 9.
- E. The proportion of co-expressed *TBX6* and *CDX2*, *T* and *SALL4*, *T* and *MIXL1*, *SOX2* and *TBX6*, *SOX2* and *T* in UiPSM at day 9. Both expressions greater than 0 SCT value were considered as co-expression (green). Only one expression greater than 0 SCT value in one cell was considered to express (red and blue). Both expressions less than 0.5 SCT value were considered as no-expression (gray).
- F. Representative flow cytometric inducible effects on T protein expression of the UiPSM (n=3 independent experiments).
- G. qRT-PCR analysis of PSM-specific genes *T*, *MIXL1*, *TBX6* and *CDX2* and UC specific genes *CD13* and *PAX8* at day 9 of the UiPSM individually. Expression levels were normalized to *GAPDH*. Data were mean  $\pm$  SD, n = 3 independent experiments.
- H. The PSM inductive efficiency of 18 urine cell samples from 10 healthy volunteers aged 20-40 years via detecting T positive frequency when reprogramming at day9. T<sup>+</sup>Prop, T positive proportion.

# Appendix Figure S2

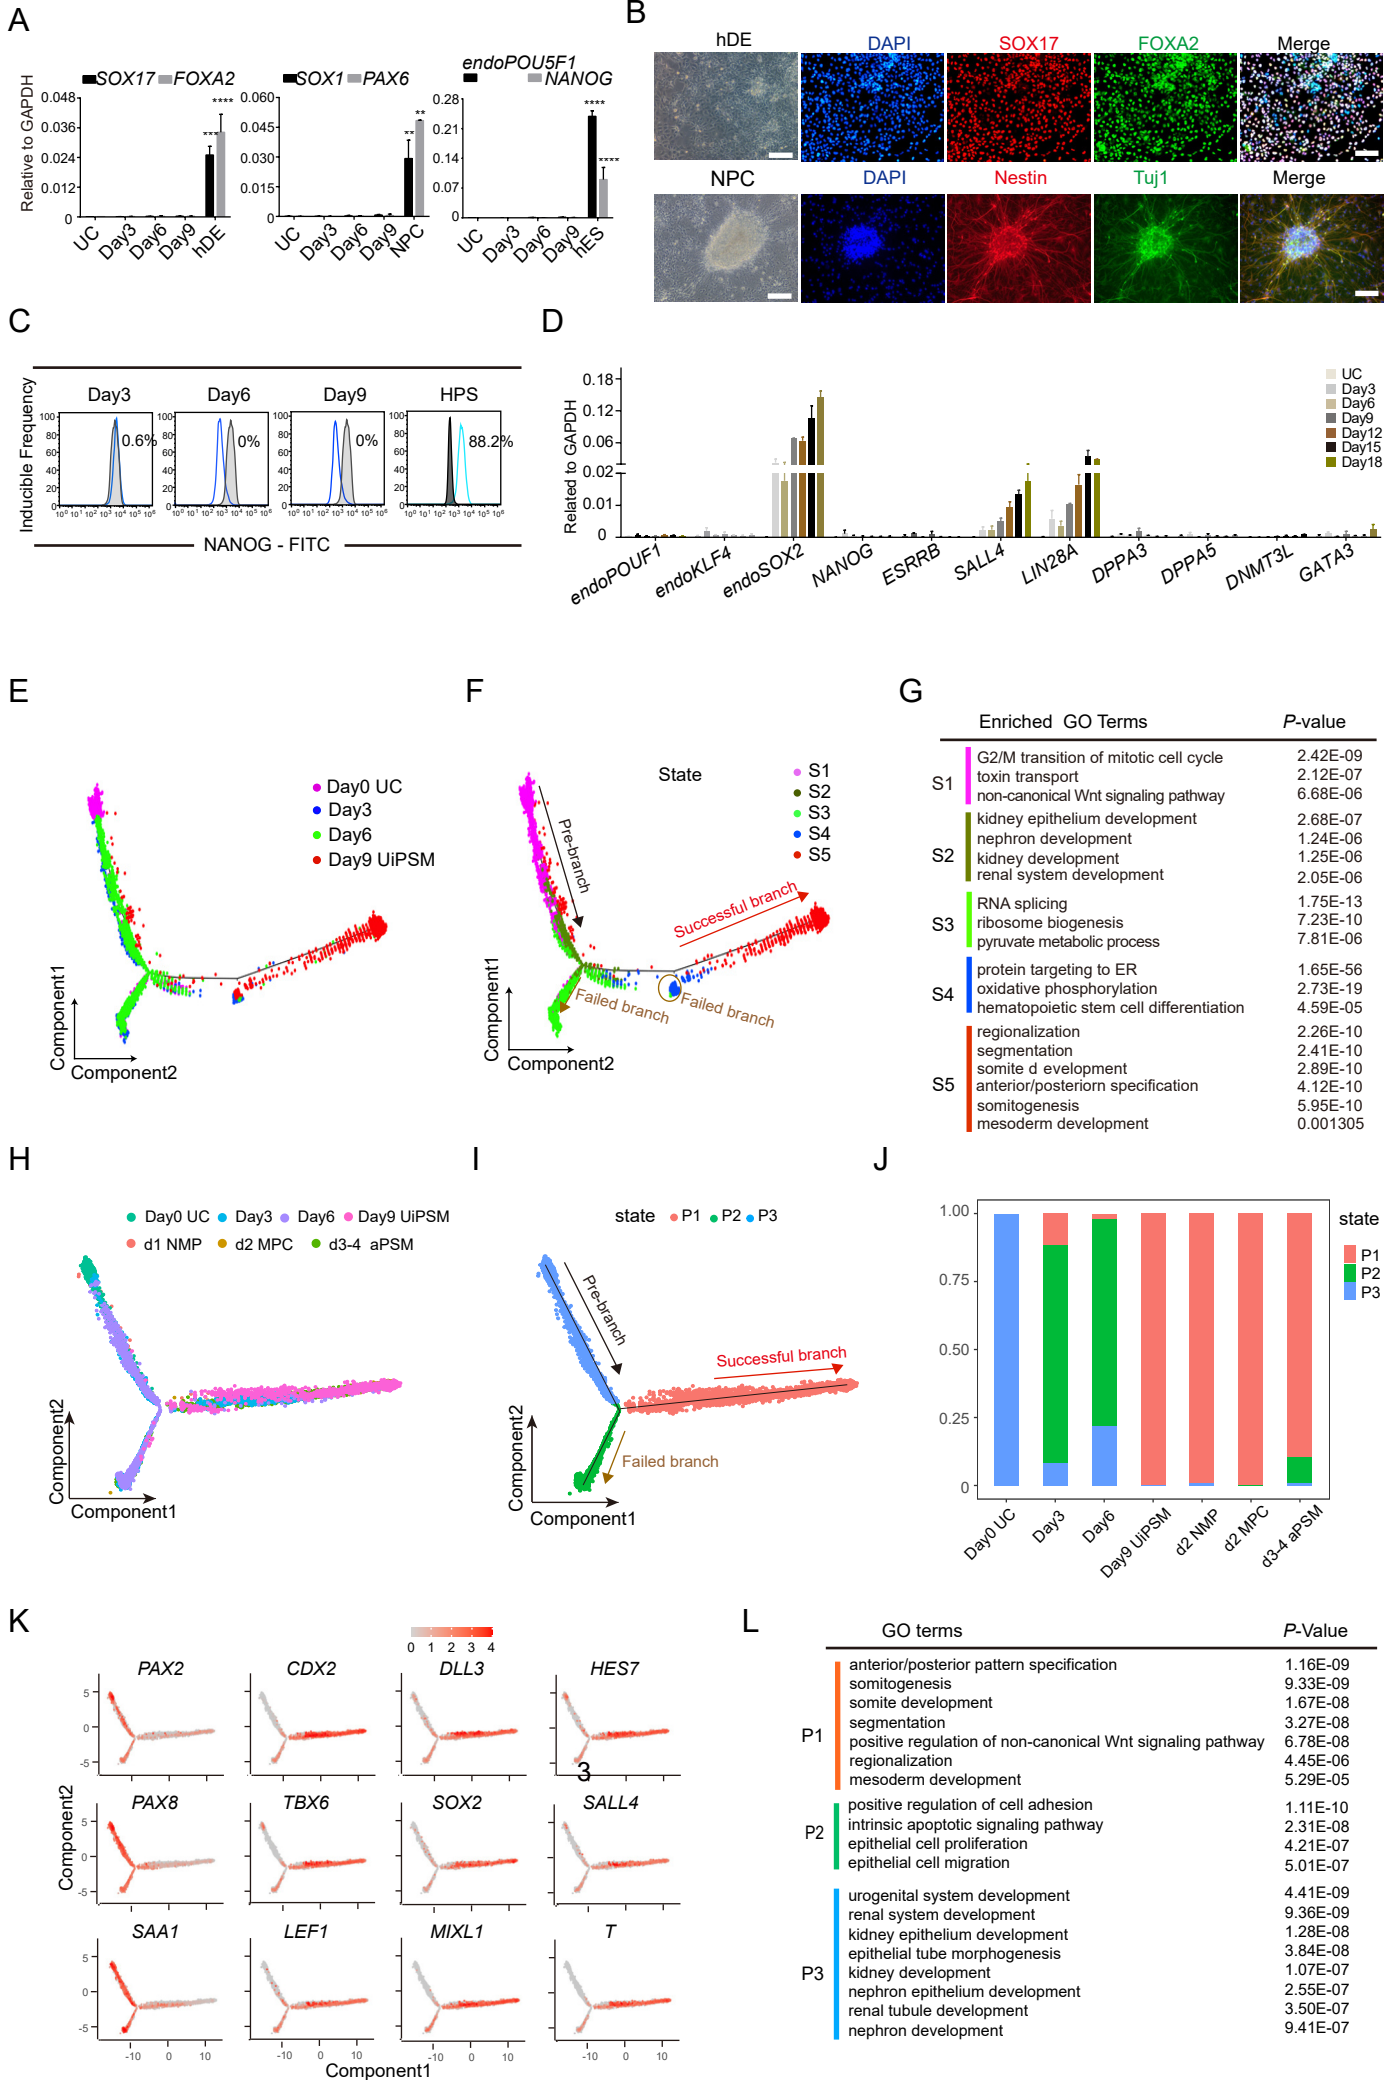

## Appendix Figure S2. Characterization of the UiPSM reprogramming process

- A. qRT-PCR analysis of layer-associated genes during the UiPSM reprogramming process versus DE (definitive endoderm), NPC (neural progenitor cell) and hESC respectively. The endoderm-associated genes *SOX17* and *FOXA2*; The ectoderm-associated genes *SOX1* and *PAX6*; The pluripotency-associated genes *POU5F1* and *NANOG*; Expression levels were normalized to *GAPDH*. Data were mean  $\pm$  SD, n = 3 independent experiments. \*\*\*p < 0.001.
- B. (Upper) Representative images of hDE, showing the co-expression of *SOX17* and *FOXA2* scale bar, 100 $\mu$ m. (Bottom) Representative images of NPC, showing the co-expression of Nestin and Tuj1, scale bar, 100 $\mu$ m. n = 3 independent experiments.
- C. Flow cytometric detected the expression of *NANOG* protein during the UiPSM reprogramming process (n = 3 biological experiments).
- D. qRT-PCR analysis of pluripotency-associated genes of the UiPSM reprogramming process. Expression levels were normalized to *GAPDH*. Data were mean  $\pm$  SD, n = 3 independent experiments.
- E. Trajectory reconstructed from all single-cell transcriptomic data throughout the UiPSM reprogramming process by Monocle2. The whole process including all 32692 individual cells at day0, day3, day6, day9, were colored by indicated time points.
- F. Cell trajectory plot revealing four branches: pre-branch, two failed branches and a successful branch. The plot was colored by cell states defined by Monocle2.
- G. Gene ontology analyses of each cell state cluster in 'E'. P value was less than 0.05.
- H. Trajectory reconstructed from all single-cell transcriptomic data throughout the UiPSM reprogramming process by Monocle2, combined with the published data (d1NMP, d2 MPC and d3-4 aPSM).
- I. Cell trajectory plot revealing three branches in 'H': pre-branch, failed branches and a successful branch. The plot was colored by cell states defined by Monocle2.
- J. The percentage change of all samples of 'H' in each state.
- K. Typical presomitic marker genes expression on cell trajectory plot in 'H'.
- L. Gene ontology analyses of each cell state cluster in 'I'. P value was less than 0.05.

# Appendix Figure S3

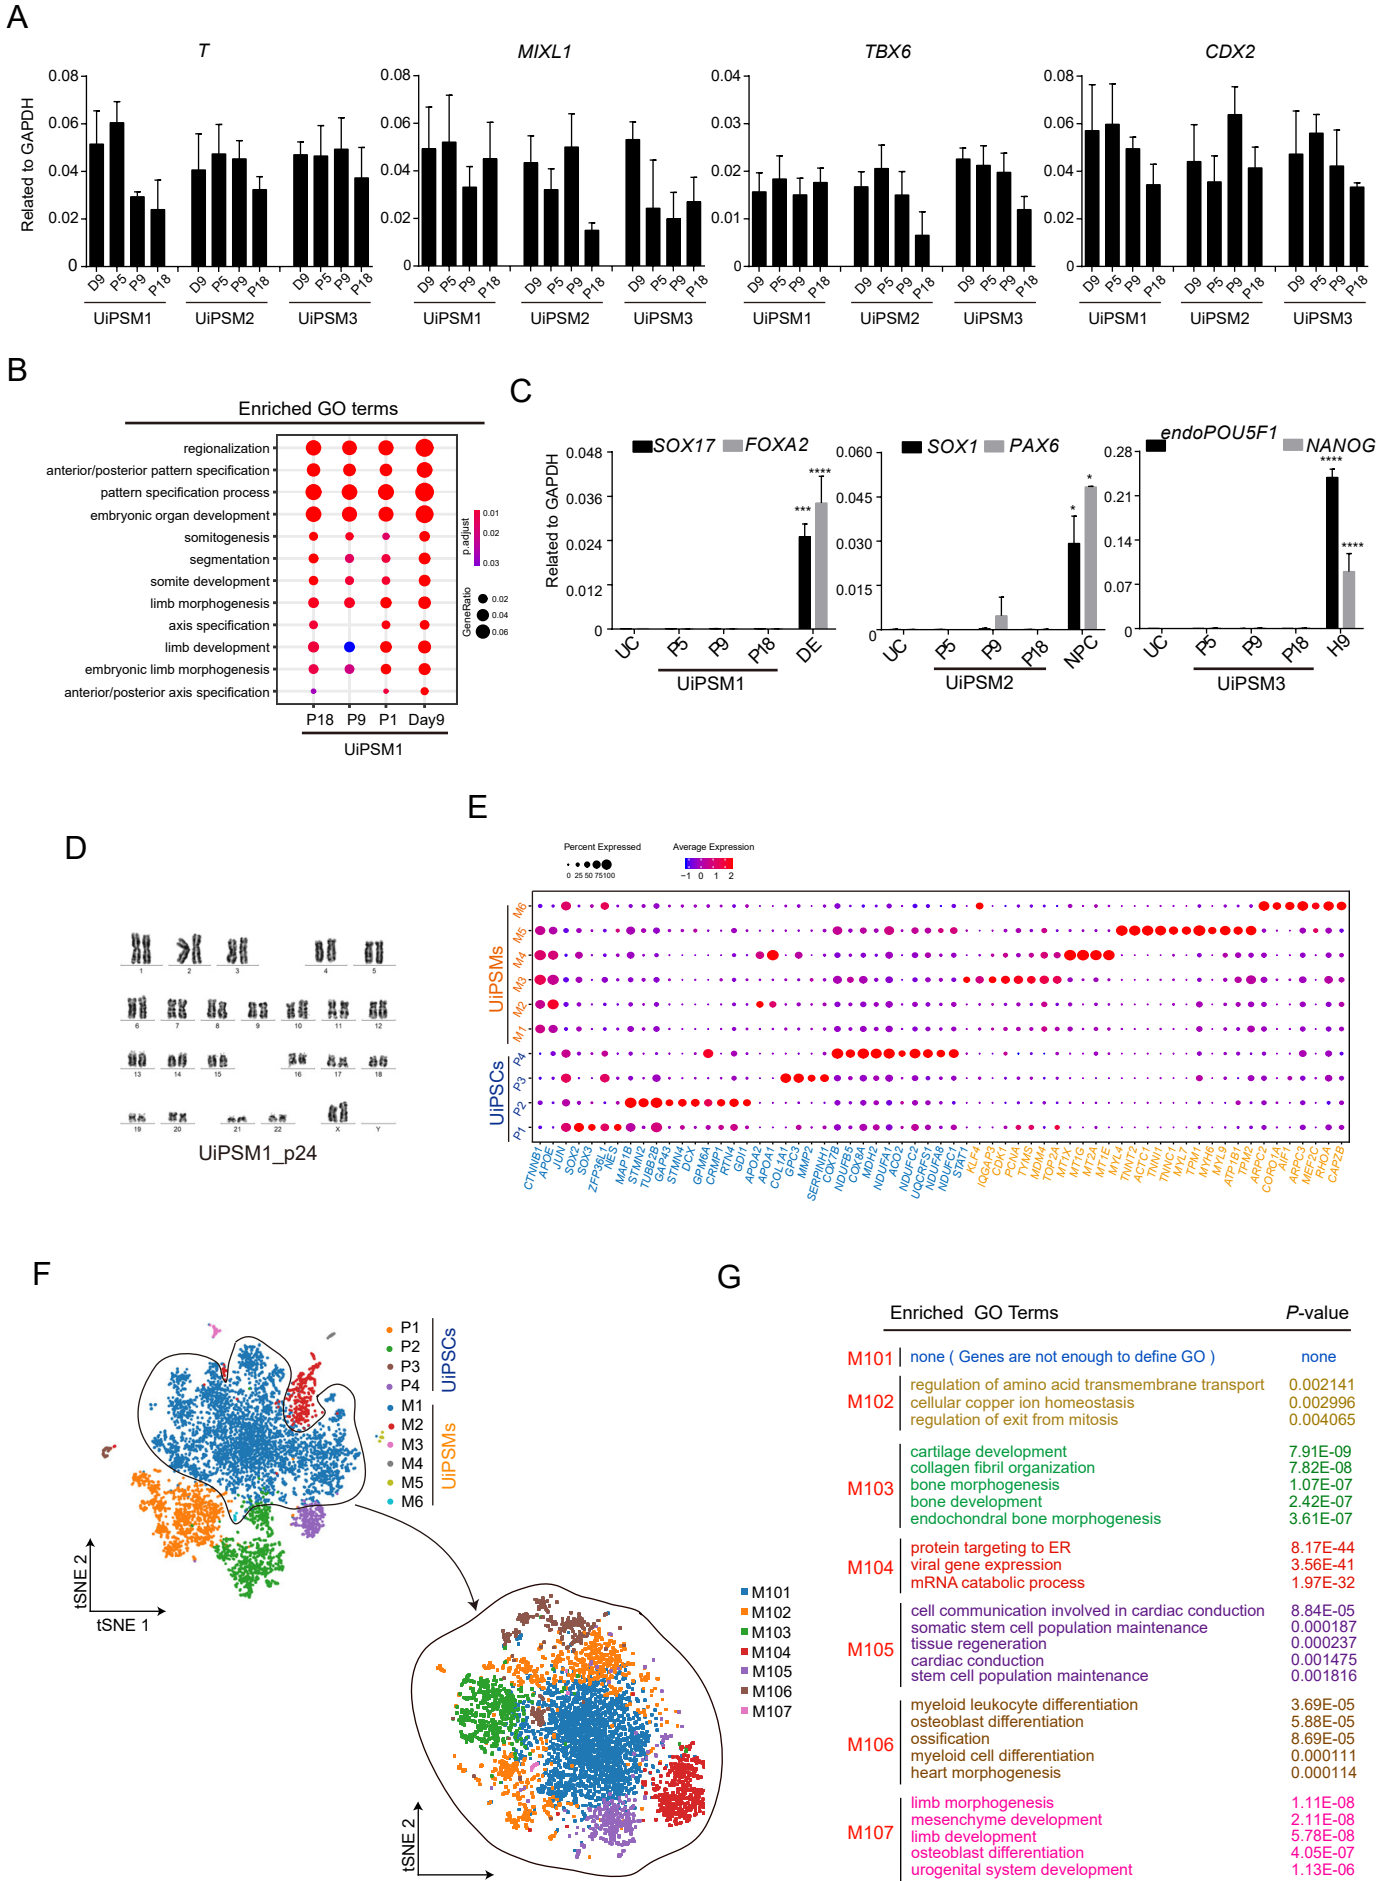

**Appendix Figure S3. Maintaining expanded UiPSM colonies derived from UCs.**

- A. Representative presomitic-mesoderm-related gene expressions of the UiPSM colonies derived from three donors. Data were mean  $\pm$  SD, n = 3 independent experiments.
- B. Enriched GO terms and p values of the UiPSM colonies at day 9, P1, P9 and P18.
- C. qRT-PCR analysis of layer-associated genes of the UiPSM colonies versus DE, NPC and hESC respectively. Expression levels were normalized to GAPDH. Data were mean  $\pm$  SD, n = 3 independent experiments. \*\*\*p < 0.001.
- D. Karyotype analysis of representative UiPSM colonies. n = 3 independent experiments.
- E. Dot plot showed the gene expression and ratio for single-cell RNA-seq data of UiPSM and UiPSC teratoma in each cluster.
- F. t-SNE plot of subpopulations of M1 cluster (bottom) in Fig 2H.
- G. Enriched gene ontology analysis of each subcluster. P value was less than 0.05.

# Appendix Figure S4

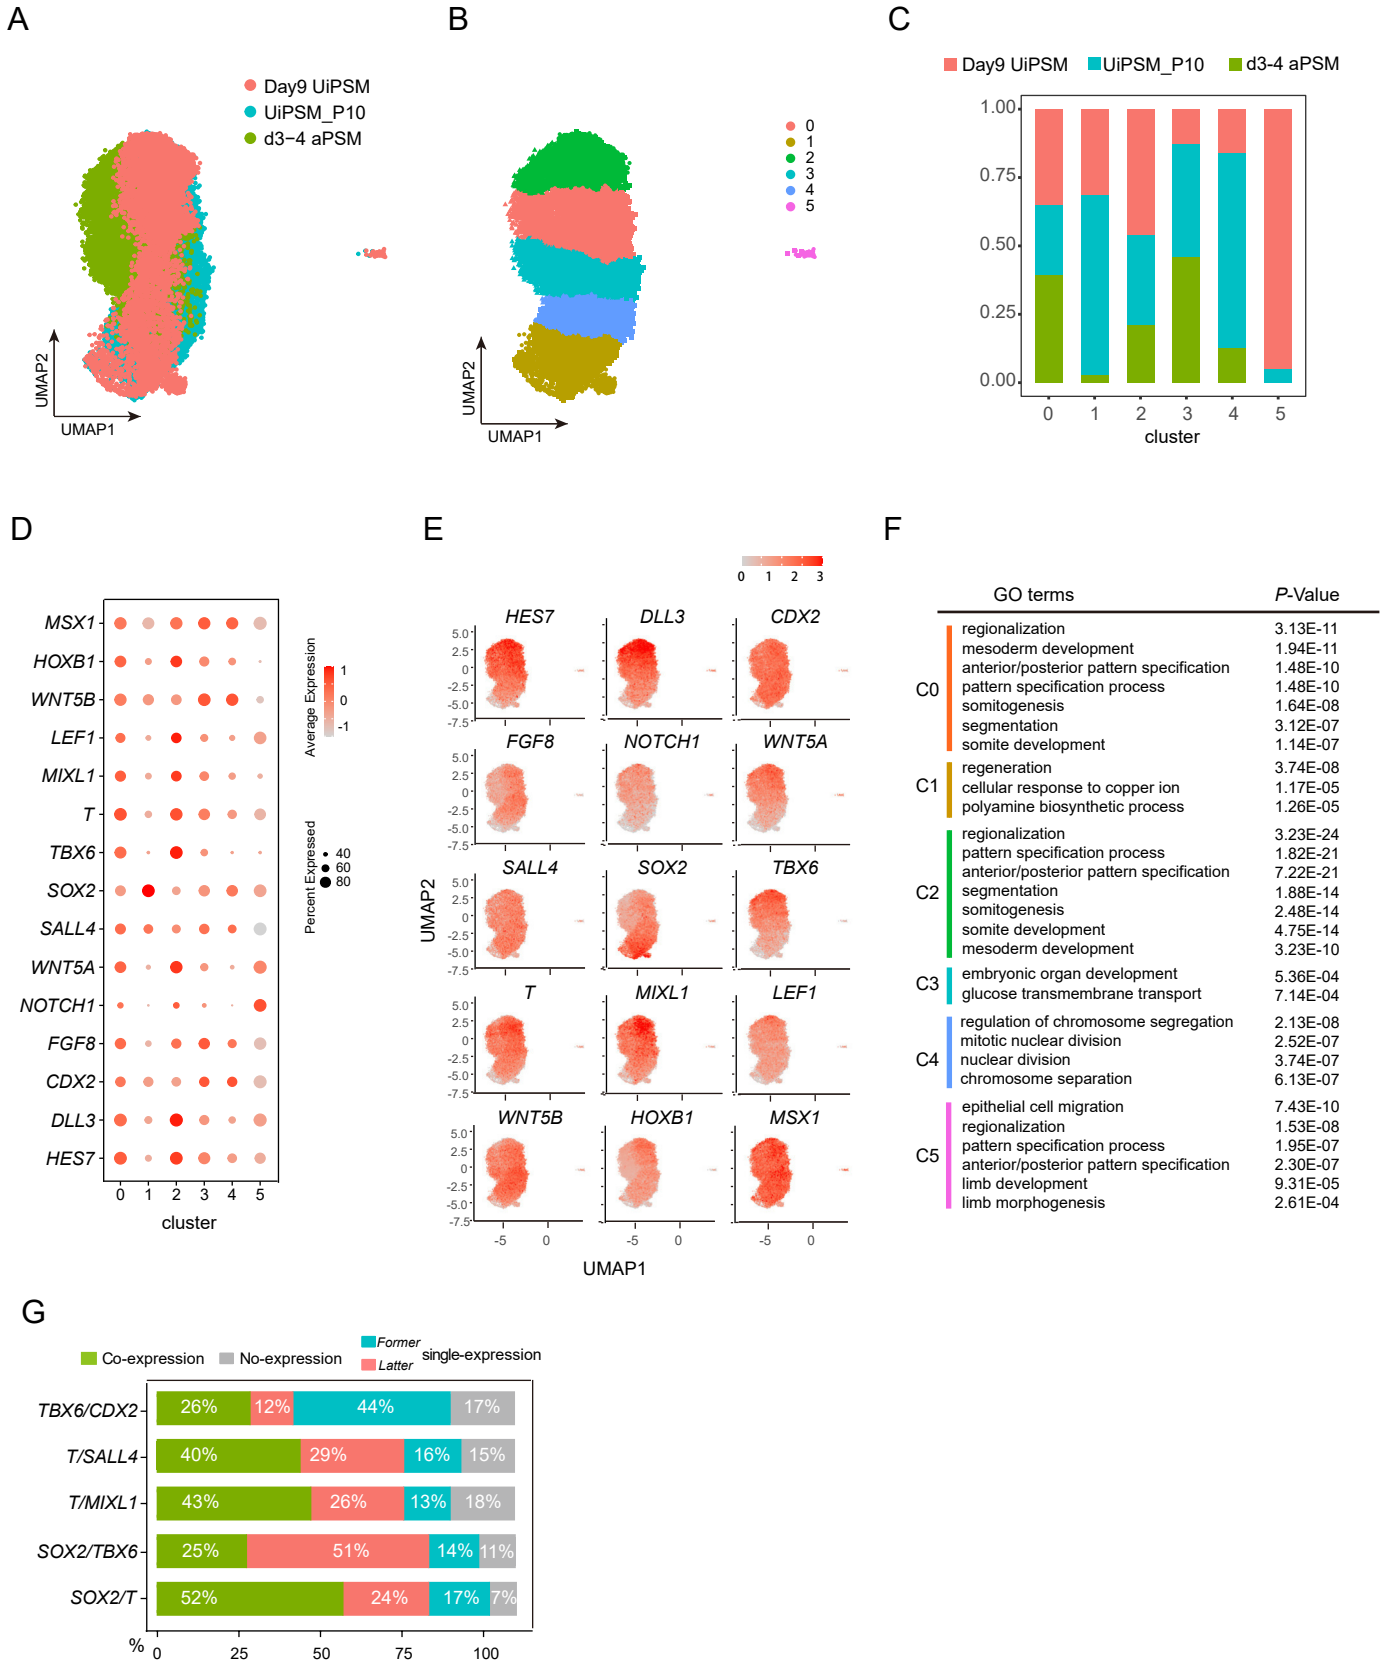



**Appendix Figure S4. Transcriptomic analysis of UiPSM clone**

- A. UMAP projection of 22957 cells from UiPSM at day 9 (6824 cells) and UiPSM\_P10 (10289 cells) and the published data (d3-4 aPSM, 5844 cells).
- B. All cells in (A) grouped into 6 clusters by Louvian clustering.
- C. The percentage change of UiPSM\_P10 and d3-4 aPSM in each cluster
- D. Dot plot showed the expression and ratio of PSM specific genes in 6 clusters
- E. Expression levels of PSM marker genes in UMAP projection.
- F. Gene ontology analysis of 6 clusters based on differentially expressed genes indicated significant enriched terms ranked by P value. P value less than 0.05.
- G. The proportion change of cells co-expressed *TBX6* and *CDX2*, *T* and *SALL4*, *T* and *MIXL1*, *SOX2* and *TBX6*, *SOX2* and *T* in UiPSM\_P10.

# Appendix Figure S5

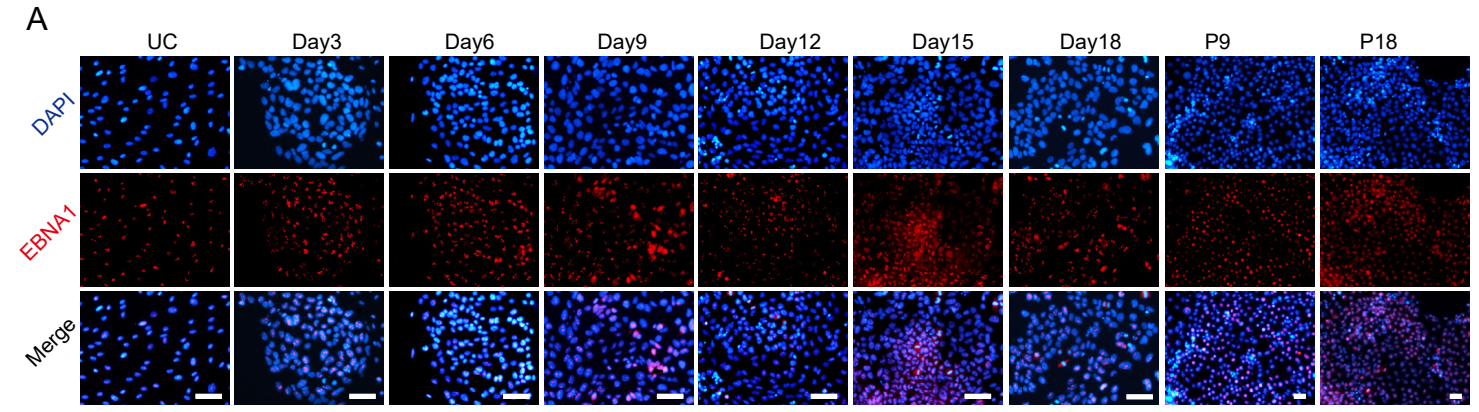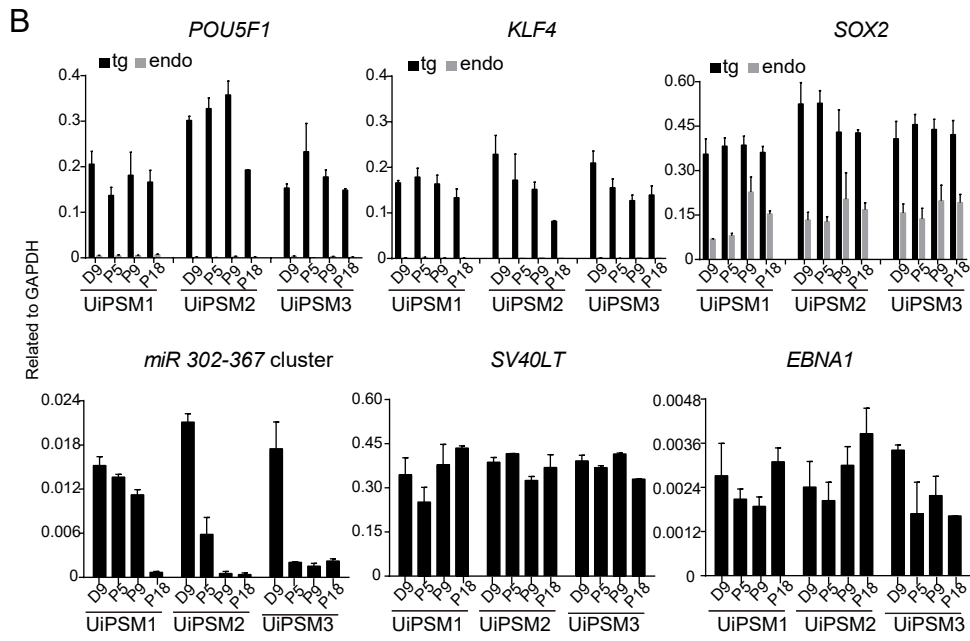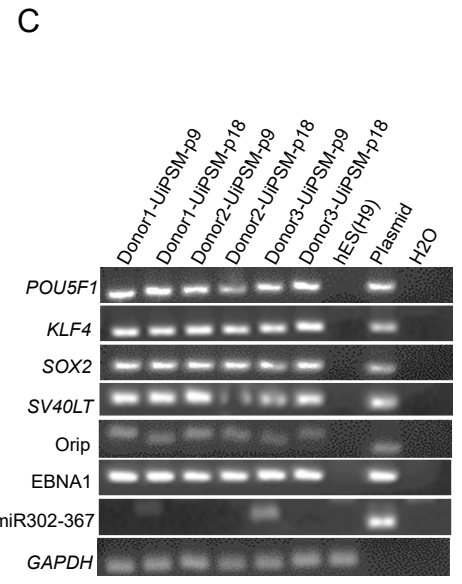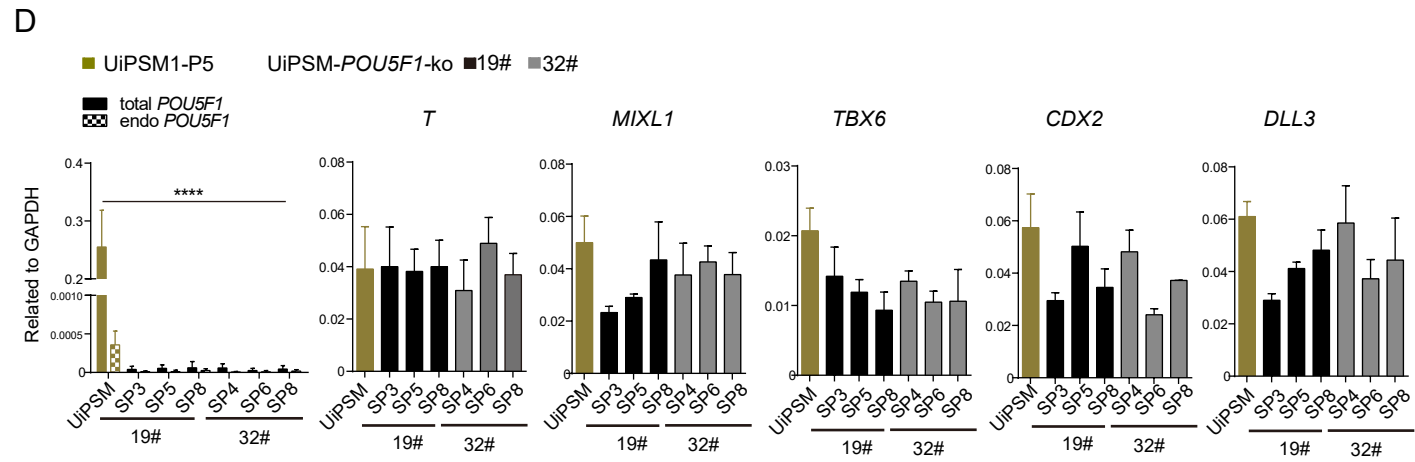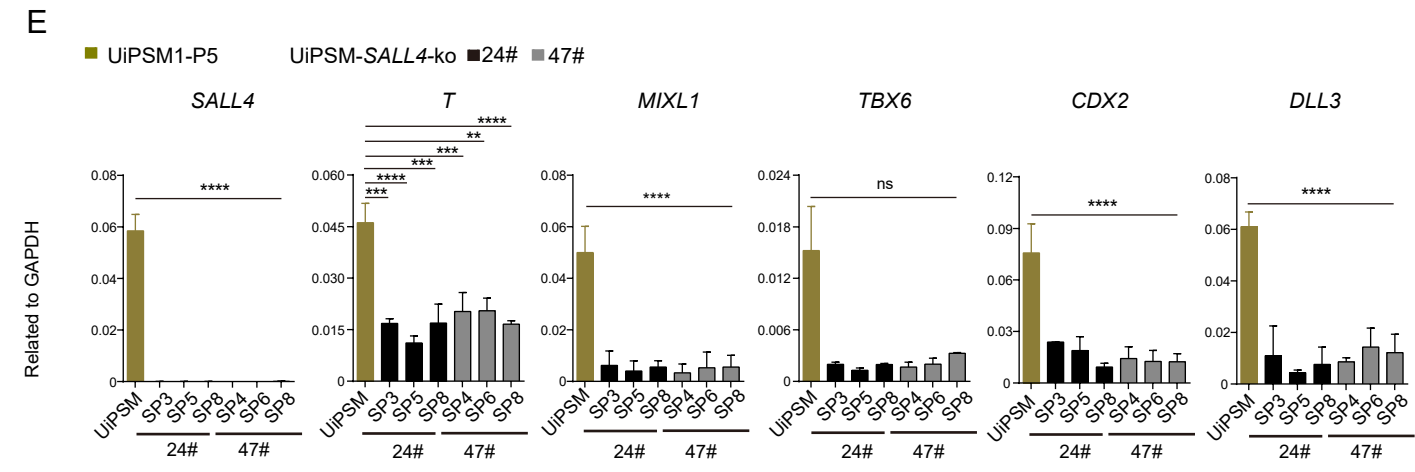

#### Appendix Figure S5. The episomal vectors work on UiPSM clone

- A. Immunofluorescence of EBNA1 (red) of the UiPSM reprogramming process and UiPSM colonies at P9 and P18. the scale bar represents 200  $\mu\text{m}$ . n = 3 independent experiments.
- B. The expression of episomal-vector-carried genes in the UiPSM colonies of various passages from three donors. 'tg' stands for the exogenous expression levels of episomal-vector-carried factors. Expression levels were normalized to *GAPDH*. Data were mean  $\pm$  SD, n = 3 independent experiments.
- C. The gel identification of insertions in UiPSM colonies. (Negative control: hES(H9); Positive control: plasmid, pEP4EO2SET2K and pCEP4-miR302-367 cluster; Blank: H<sub>2</sub>O). n  $\geq$  10 independent experiments.
- D-E. qRT-PCR analyzed the expression levels of PSM-specific genes in POU5F1-knocked out (D) and SALL4-knocked out (E) UiPSM colonies. Expression levels were normalized to *GAPDH*. Data were mean  $\pm$  SD, n = 3 independent experiments. \*\*\*\*p < 0.0001.

# Appendix Figure S6

**A**

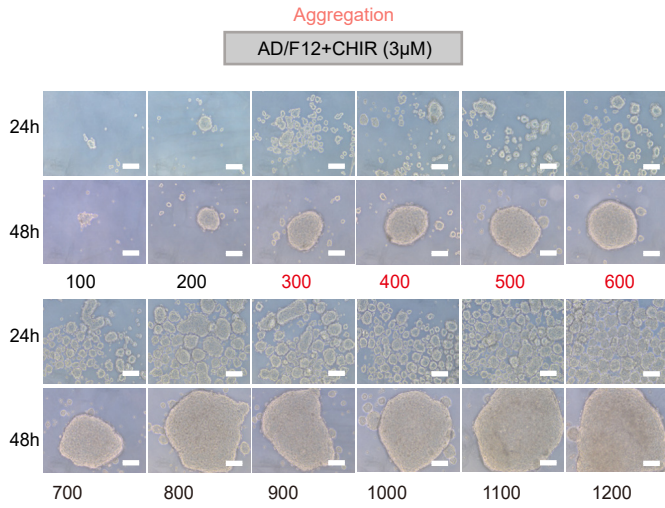

**B**

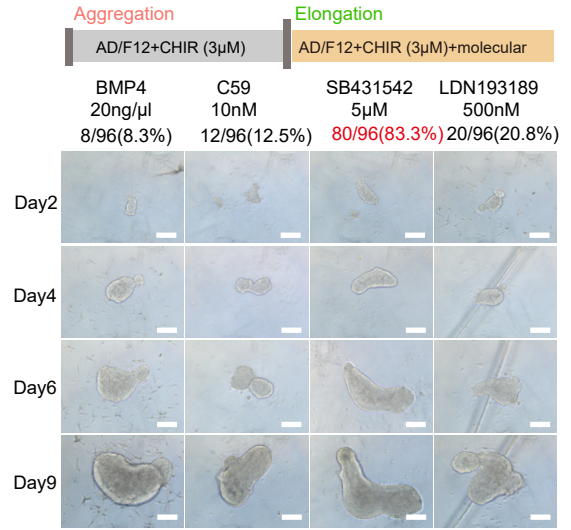

**C**

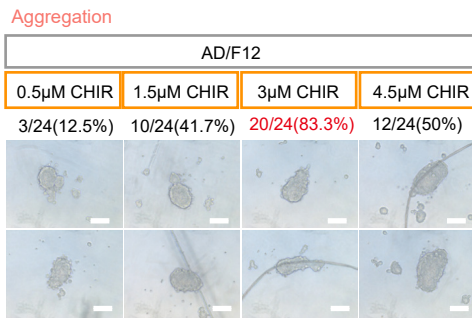

**D**

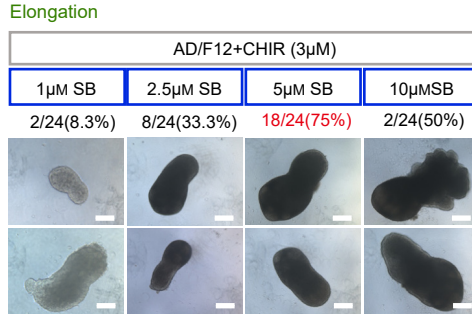

**F**

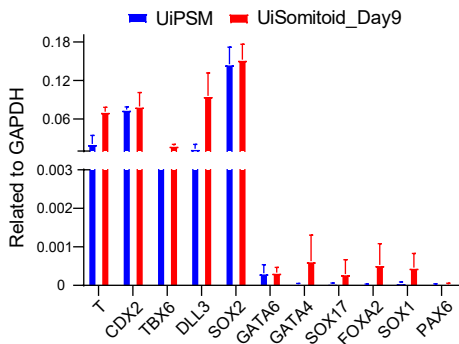

**E**

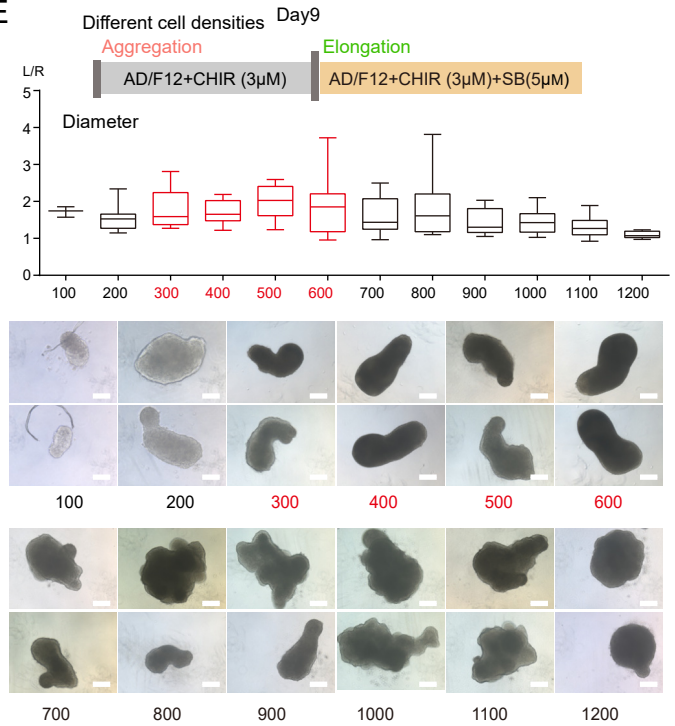

**G**

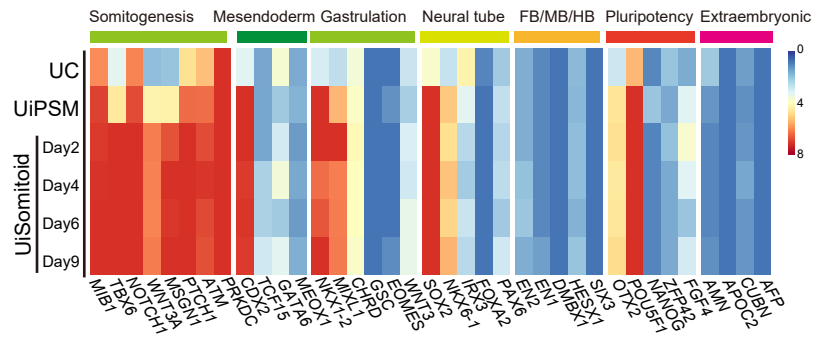

**Appendix Figure S6. The elongation of UiSomitoids rely on Nodal signaling pathway regulation.**

- A. The aggregation of UiPSM cultured in DM medium for 2 days under different initial seeding density. Scale bars, 200  $\mu\text{m}$ . n=3 independent experiments.
- B. **UiPSM cells (400 cells in a well) cultured in DM medium for 2 days formed aggregates, and elongated with different molecules for 7 days.** Scale bars, 200  $\mu\text{m}$ . 24 UiSomitoids were collected in one experiment and the elongated efficiency was calculated in all 4 independent experiments.
- C. The aggregation efficiency under the gradient treatment of CHIR99021 via calculating 24 aggregates in one experiment. Scale bars, 200  $\mu\text{m}$ . n=3 independent experiments.
- D. The elongated efficiency changes with increasing concentration of SB431542 calculated with 24 aggregates in one experiment. Scale bars, 200  $\mu\text{m}$ . n=3 independent experiments.
- E. The elongation rate of the aggregates treated with 3 $\mu\text{M}$  CHIR99021+ 5 $\mu\text{M}$  SB431542 under different initial seeding density. Scale bars, 200  $\mu\text{m}$ . 24 aggregates in one experiment. n=3 independent experiments.
- F. qRT-PCR analysis of PSM-associated genes (*T*, *CDX2*, *TBX6*, *SOX2*) and mesendoderm-related genes (*GATA4* and *GATA6*), endodermal makers (*SOX17* and *FOXA2*), ectodermal markers (*SOX1* and *PAX6*) of the UiPSM cells and elongated UiSomitoids at day9. Expression levels were normalized to *GAPDH*. Data were mean  $\pm$  SD, n = 3 independent experiments.
- G. RNA-seq data analysis about the expression levels of somitogenesis-, mesendoderm-, gastrulation-, neural tube-, forebrain/middle-brain/hind-brain-(FB/MB/HB), pluripotency- and extraembryonic-related genes during the UiSomitoid elongation. P value is less than 0.05.

# Appendix Figure S7

**A**

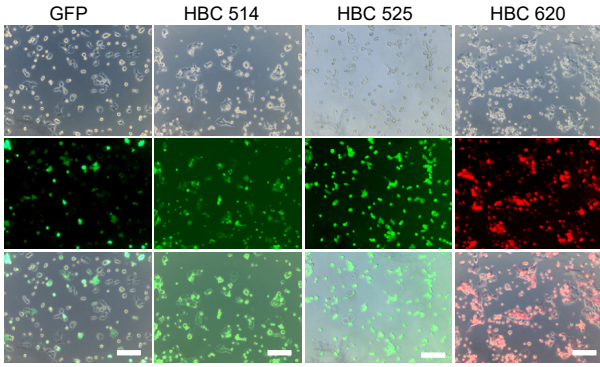

**B**

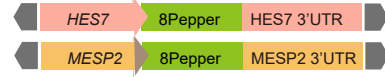

UiPSM-*HES7*-8pepper-sp5 (9#)      UiPSM-*MESP2*-8pepper-sp4 (17#)

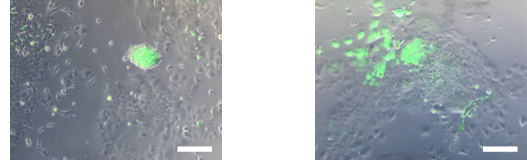

**C**

• UiPSM-*HES7*-8pepper-sp5

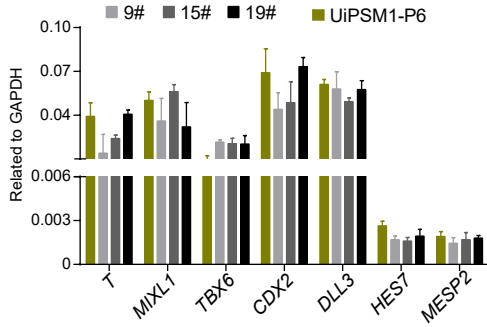

**D**

• UiPSM-*MESP2*-8pepper-sp4

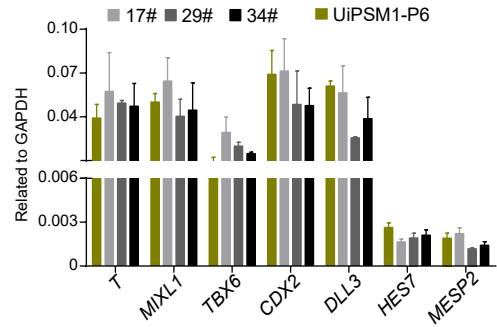

**E**

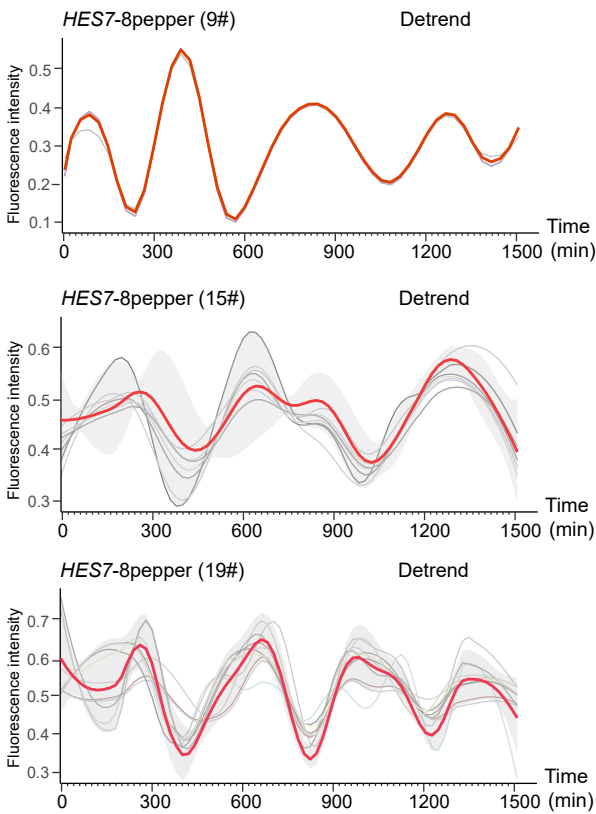

**F**

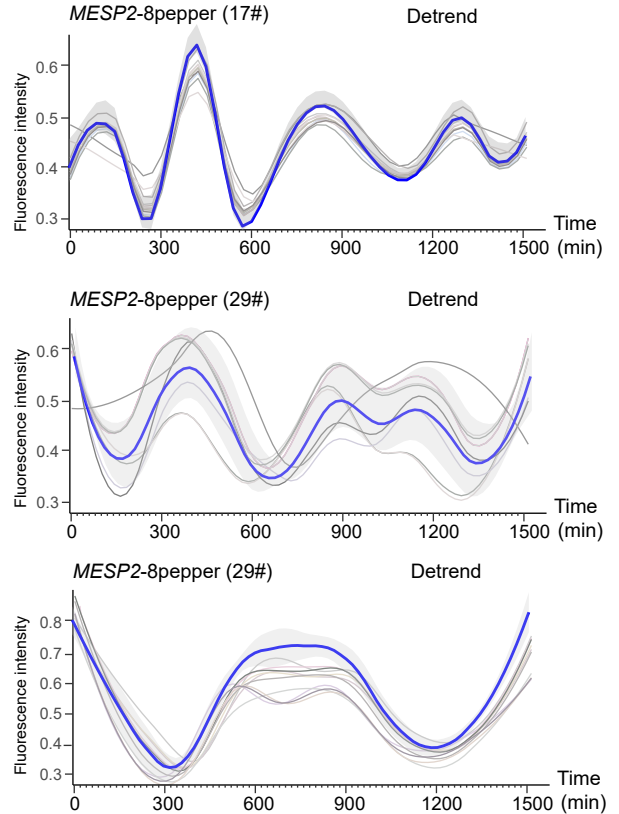

**G**

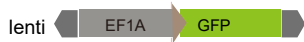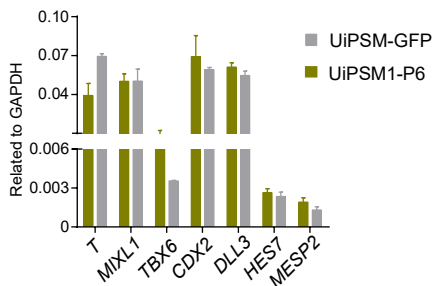

**H**

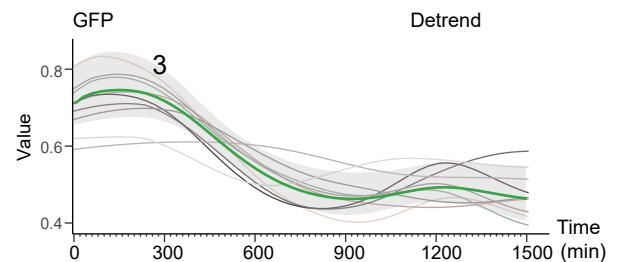

**Appendix Figure S7. The construction of *HES7* and *MESP2* oscillation reporter cell lines.**

- A. Pepper aptamers (fluorescent RNAs) can bind and activate fluorescent dyes HBC 514,525,620 in UiPSM (n =3 independent experiments). Scale bars, 200  $\mu$ m.
- B. Reporter cell lines for tracking gene *HES7* and *MESP2* oscillations. Negative control: UiPSM cell line overexpressing lenti-GFP. Representative images showed UiPSM-*HES7*-8pepper colonies and UiPSM-*MESP2*-8pepper colonies. Scale bars, 200  $\mu$ m.
- C-D. qRT-PCR analysis of PSM-associated genes of the UiPSM-*HES7*-8pepper colonies and UiPSM-*MESP2*-8pepper colonies. Expression levels were normalized to *GAPDH*. Data were mean  $\pm$  SD, n = 3 independent experiments.
- E-F. Oscillatory *HES7* (E) and *MESP2* (F) reporter activity measured with Incucyte® S3 Live-Cell Analysis System. Mean intensity profiles for three UiSomitoids were normalized and detrended. Red (or blue) line stands for trend line and each grey line was measured in one experiment. Shaded regions indicate means  $\pm$  SD, n = 7,12,10 independent experiments for *HES7* and n = 11,9,9 independent experiments for *MESP2*.
- G. qRT-PCR analysis of PSM-associated genes of the UiPSM-*GFP* colonies. Expression levels were normalized to *GAPDH*. Data were mean  $\pm$  SD, n = 3 independent experiments.
- H. The GFP intensity measured with Incucyte® S3 Live-Cell Analysis System. Green line stands for the trend line, each grey line was measured in one experiment. Shaded regions indicate means  $\pm$  SD, n = 10 independent experiments.

# Appendix Figure S8

A

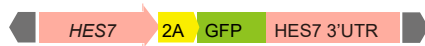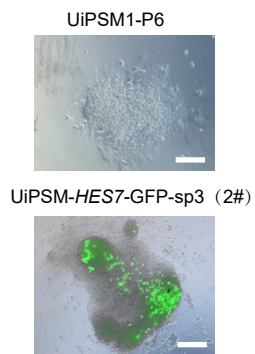

B

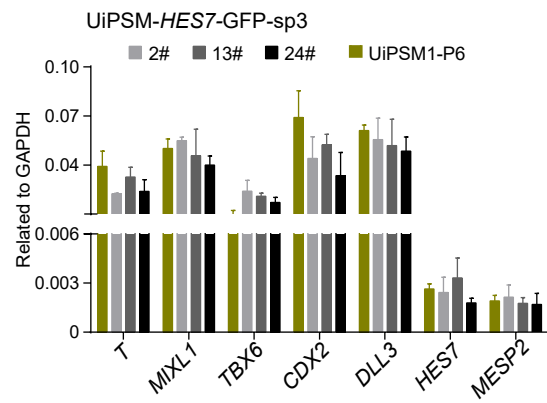

C

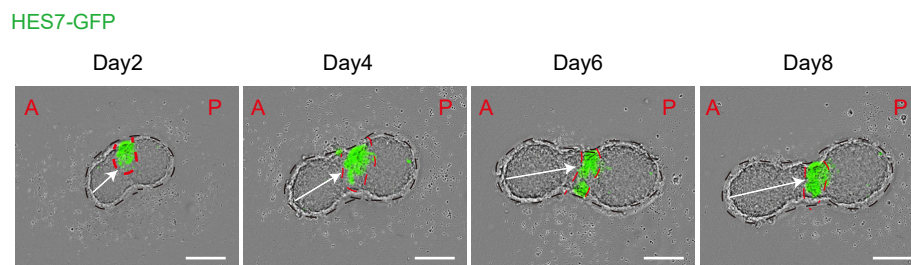



**Appendix Figure S8. The elongation of UiSomitoids along the A-P axis.**

- A. Representative images showed UiPSM colonies and UiPSM-*HES7*-GFP colonies. Scale bars, 100  $\mu\text{m}$ .
- B. qRT-PCR analysis of PSM-associated genes of the UiPSM-*HES7*-GFP colonies. Expression levels were normalized to *GAPDH*. Data were mean  $\pm$  SD, n = 3 independent experiments.
- C. Fluorescence images showing the expression change of HES7 along the A-P axis of the UiSomitoid (green, HES7- GFP). n =3 independent experiments. Scale bars, 400  $\mu\text{m}$ .

# Appendix Figure S9

A

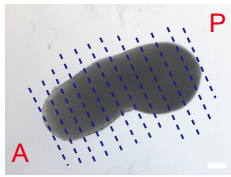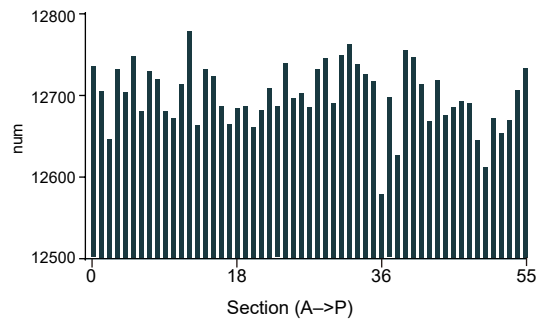

B

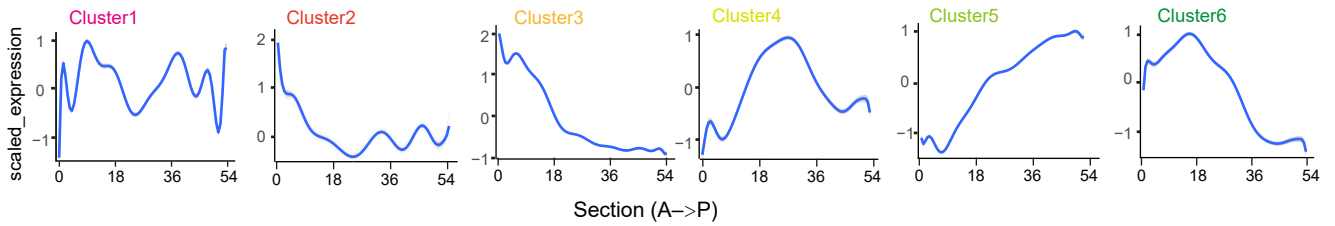

C

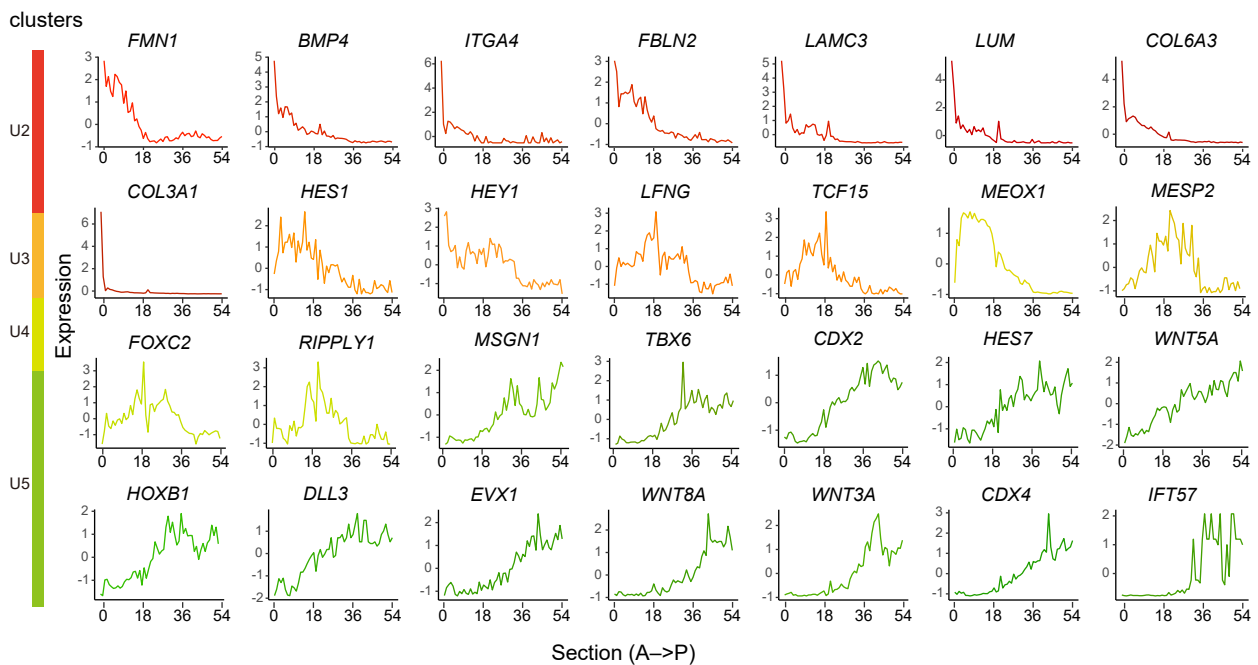

D

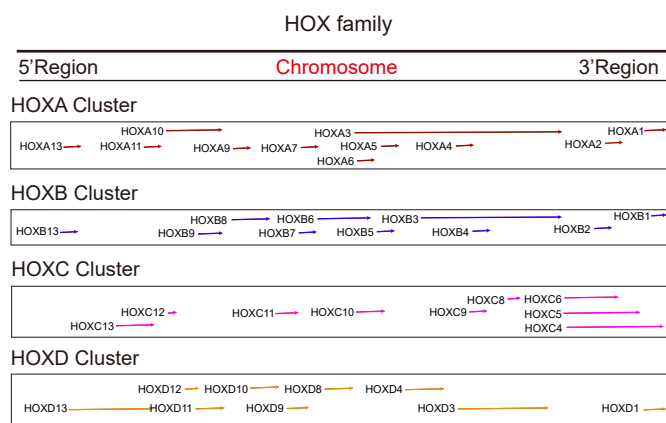

E

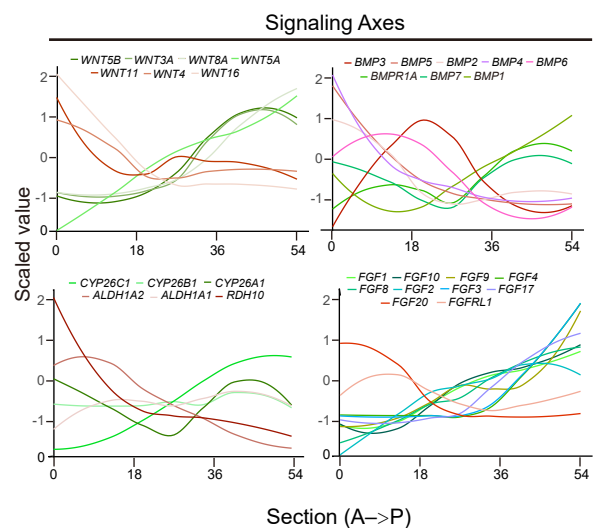

**Appendix Figure S9. Transcriptomic anteroposterior organization of UiSomitoid**

- A. Representative image illustrating the sections of the sequencing sample. Scale bars, 400  $\mu\text{m}$ . Quantification of the number of detectable genes in each section along the anteroposterior axis of UiSomitoid.
- B. The gene expression patterns of 6 clusters along the anterior-posterior axis of UiSomitoid.
- C. Line charts illustrating the trends of typical genes in selected gene clusters.
- D. Schematic overview of the genomic distribution of the HOX family.
- E. The expressional distribution of Wnt, BMP, RA and FGF signaling pathways along the anteroposterior axis.

**Appendix Table S1. qPCR primers information**

All qPCR primers were designed by Beacon Designer software.

| qPCR primers      |                       |                          |
|-------------------|-----------------------|--------------------------|
| Gene              | Forward               | Reverse                  |
| <i>GAPDH</i>      | GTGGACCTGACCTGCCGTCT  | GGAGGAGTGGGTGTCGCTGT     |
| <i>T</i>          | TGCTTCCCTGAGACCCAGTT  | GATCACTTCTTTCTTTGCATCAAG |
| <i>MIXL1</i>      | AGGCAGGAGAATCACTTG    | GGCTACCACAGAACCATAG      |
| <i>TBX6</i>       | GTGACAGCCTACCAGAAC    | GTGACAGCCTACCAGAAC       |
| <i>CDX2</i>       | TTCACTACAGTCGCTACATC  | TTTCTCTCTCTTTGCTCTG      |
| <i>HES7</i>       | GAATATAAGGCTCCAGGC    | CTATTCTCAGCTCGATCC       |
| <i>DLL3</i>       | TCGTCCGTAGATTGGAAT    | GTAGATGGAAGGAGCAGATA     |
| <i>MESP2</i>      | GTCTCTCTGTGTCTCCAG    | CAGTCTCTGGCATGATGG       |
| <i>CD13</i>       | TTCAGCACATCAGGCAAT    | TTCTCTTCGTCTAGTTCAC      |
| <i>PAX8</i>       | CTGTGACAATGACACTGT    | ATAGGGAGGTTGAATGGT       |
| <i>EndoPOU5F1</i> | CCTCACTTCACTGCACTGTA  | GGAGGAGTGGGTGTCGCTGT     |
| <i>EndoKLF4</i>   | GCCTTGCTGATTGTCTAT    | AAGTCAACGAAGAGAAGAA      |
| <i>EndoSOX2</i>   | TTCAAGGAGAGGCTTCTT    | AACAAGACCACAGAGATG       |
| <i>NANOG</i>      | AAGGTCCCGGTCAAGAAACAG | CTTCTGCGTCACACCATTGC     |
| <i>ESRRB</i>      | CTCAGAGAGCAGCCCATA    | CCAGTAGGTATGAGACAATCTTG  |
| <i>SALL4</i>      | TCACCGAACCAACACATC    | CAGCATCACGGCATTAGT       |
| <i>LIN28A</i>     | TTAAGAAGTCAGCCAAGG    | CTCTCACTCCCAATACAG       |
| <i>DPPA3</i>      | TGAAAGAAGACCAACAAACA  | TCCATTAGACACGCAGAA       |
| <i>DPPA5</i>      | ATCTCGAATCCCTTACAT    | TACAAATAGGAGCCGTAA       |
| <i>DNMT3L</i>     | TTCGGAAGAAGAATTGTC    | GAAGTGAGTTCTGTTGAA       |
| <i>GATA3</i>      | AAGGCATCCAGACCAGAA    | AAGTCCTCCAGTGAGTCAT      |
| <i>SOX1</i>       | TTTCCCCTCGCTTTCTCA    | TTTCCCCTCGCTTTCTCA       |
| <i>PAX6</i>       | TTGCTTGGGAAATCCGAG    | TGCCCGTTCAACATCCTT       |
| <i>SOX17</i>      | CTCCGGTGTGAATCTCCCC   | CTCCGGTGTGAATCTCCCC      |
| <i>FOXA2</i>      | ACAGCAGTCTTCTTACC     | AGCAGGAGTCTACACAGTA      |
